# Supplementary material for: Fine Mapping of BoVl Conferring the Variegated Leaf in Ornamental Kale (Brassica oleracea var. acephala)
Source: MDPI journal article supplement (doi:10.3390/ijms232314853), 2022-11-27
Supplement: s1 [file s1]

# **Fine mapping of *BoVl* conferring variegated leaf in ornamental kale** **(*Brassica oleracea* var. *acephala*)**

## **Supplementary information: Figure S1-S6 and Table S1-S4.**

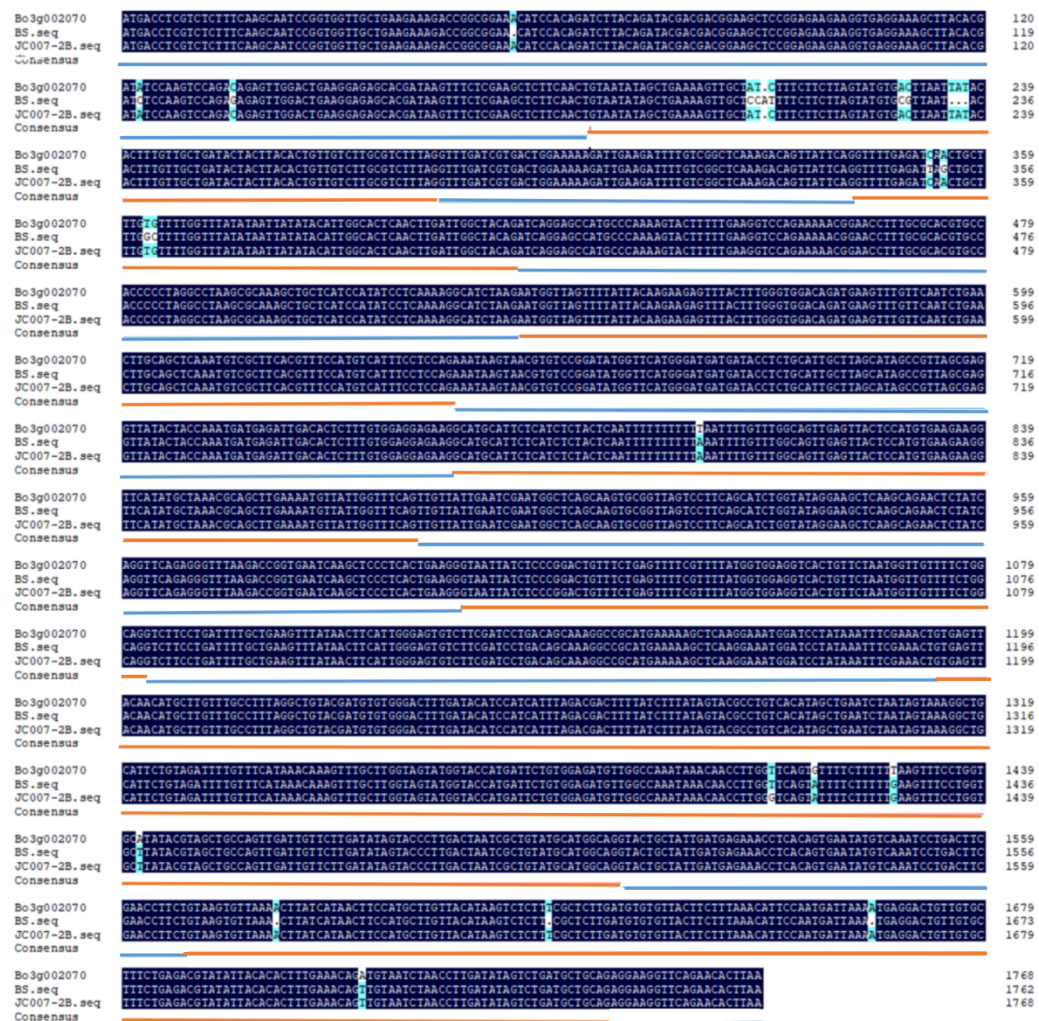

**Figure S1. Alignments of nucleotide sequences of *Bo3g002070* in ‘BS’ and ‘JC007-2B’. Note: *Bo3g002070* is the reference genome sequence of cabbage; Blue underline indicates exon; Red underline indicates intron.**

|                |                                                                                                                         |      |
|----------------|-------------------------------------------------------------------------------------------------------------------------|------|
| Bo3g002090.seq | ATGGCAGCGCCGCGCACGCCCTTAGTCACCGTCCAAGGACTCGACGGAGACATGACAACCGACCAATCCACCACCGTCTGCTACCCGAGCTCATGACCGCGCCGTTGACACAGAC     | 120  |
| BS.seq         | ATGGCAGCGCCGCGCACGCCCTTAGTCACCGTCCAAGGACTCGACGGAGACATGACAACCGACCAATCCACCACCGTCTGCTACCCGAGCTCATGACCGCGCCGTTGACACAGAC     | 120  |
| JC007-2B.seq   | ATGGCAGCGCCGCGCACGCCCTTAGTCACCGTCCAAGGACTCGACGGAGACATGACAACCGACCAATCCACCACCGTCTGCTACCCGAGCTCATGACCGCGCCGTTGACACAGAC     | 120  |
| Consensus      | ATGGCAGCGCCGCGCACGCCCTTAGTCACCGTCCAAGGACTCGACGGAGACATGACAACCGACCAATCCACCACCGTCTGCTACCCGAGCTCATGACCGCGCCGTTGACACAGAC     |      |
| Bo3g002090.seq | ATCGTCAACTTCGTCCACGCCAAATCTCAAAACAACAGCGCTCAGCCTTACGCCGTCTCCAAAAAGCCGGTCACAGACCTCCGCCGAGTCATGGGAAACCGGACGCCGCTTCCCGT    | 240  |
| BS.seq         | ATCGTCAACTTCGTCCACGCCAAATCTCAAAACAACAGCGCTCAGCCTTACGCCGTCTCCAAAAAGCCGGTCACAGACCTCCGCCGAGTCATGGGAAACCGGACGCCGCTTCCCGT    | 240  |
| JC007-2B.seq   | ATCGTCAACTTCGTCCACGCCAAATCTCAAAACAACAGCGCTCAGCCTTACGCCGTCTCCAAAAAGCCGGTCACAGACCTCCGCCGAGTCATGGGAAACCGGACGCCGCTTCCCGT    | 240  |
| Consensus      | ATCGTCAACTTCGTCCACGCCAAATCTCAAAACAACAGCGCTCAGCCTTACGCCGTCTCCAAAAAGCCGGTCACAGACCTCCGCCGAGTCATGGGAAACCGGACGCCGCTTCCCGT    |      |
| Bo3g002090.seq | ATCCCTCGTGTTCCTCCGCGGGAACACACCGCCGCGCAAGCGGCTTCGGAACATGTCGCGGTGGTCGGATGTTCCCTCCGACTAAGATCTGGAGACGTGGCACCCTCGCGTC        | 360  |
| BS.seq         | ATCCCTCGTGTTCCTCCGCGGGAACACACCGCCGCGCAAGCGGCTTCGGAACATGTCGCGGTGGTCGGATGTTCCCTCCGACTAAGATCTGGAGACGTGGCACCCTCGCGTC        | 360  |
| JC007-2B.seq   | ATCCCTCGTGTTCCTCCGCGGGAACACACCGCCGCGCAAGCGGCTTCGGAACATGTCGCGGTGGTCGGATGTTCCCTCCGACTAAGATCTGGAGACGTGGCACCCTCGCGTC        | 360  |
| Consensus      | ATCCCTCGTGTTCCTCCGCGGGAACACACCGCCGCGCAAGCGGCTTCGGAACATGTCGCGGTGGTCGGATGTTCCCTCCGACTAAGATCTGGAGACGTGGCACCCTCGCGTC        |      |
| Bo3g002090.seq | AACGTCAACATGAAGAGGACGCGATCGTCTCGGCAATCGCCGCGCACCGCGGTTCCCGCGCTCGTGTATGGCAGCTGGCCACAGATCGAGAATGTCCCGAGATGCTCTTGTGTATAGC  | 480  |
| BS.seq         | AACGTCAACATGAAGAGGACGCGATCGTCTCGGCAATCGCCGCGCACCGCGGTTCCCGCGCTCGTGTATGGCAGCTGGCCACAGATCGAGAATGTCCCGAGATGCTCTTGTGTATAGC  | 480  |
| JC007-2B.seq   | AACGTCAACATGAAGAGGACGCGATCGTCTCGGCAATCGCCGCGCACCGCGGTTCCCGCGCTCGTGTATGGCAGCTGGCCACAGATCGAGAATGTCCCGAGATGCTCTTGTGTATAGC  | 480  |
| Consensus      | AACGTCAACATGAAGAGGACGCGATCGTCTCGGCAATCGCCGCGCACCGCGGTTCCCGCGCTCGTGTATGGCAGCTGGCCACAGATCGAGAATGTCCCGAGATGCTCTTGTGTATAGC  |      |
| Bo3g002090.seq | GACTCAGCTGAGGCCGTTGAGAAGACTAACGCCCAATCAAGGTTTTGAAGCAGATCGGTGCTTATGATGACGCCGAGAAGGCGAAGGATAGTATGGGATTAGGTCTGGTGTGTATAG   | 600  |
| BS.seq         | GACTCAGCTGAGGCCGTTGAGAAGACTAACGCCCAATCAAGGTTTTGAAGCAGATCGGTGCTTATGATGACGCCGAGAAGGCGAAGGATAGTATGGGATTAGGTCTGGTGTGTATAG   | 600  |
| JC007-2B.seq   | GACTCAGCTGAGGCCGTTGAGAAGACTAACGCCCAATCAAGGTTTTGAAGCAGATCGGTGCTTATGATGACGCCGAGAAGGCGAAGGATAGTATGGGATTAGGTCTGGTGTGTATAG   | 600  |
| Consensus      | GACTCAGCTGAGGCCGTTGAGAAGACTAACGCCCAATCAAGGTTTTGAAGCAGATCGGTGCTTATGATGACGCCGAGAAGGCGAAGGATAGTATGGGATTAGGTCTGGTGTGTATAG   |      |
| Bo3g002090.seq | ATGAGGAACCGTCTTACATTTCTAGGAAGGTCCTCTGTGTGTGACGGAACCGAGGAGCTAAGATGTGAAAGCGTTTAGGAACATTACTGGCGTTGAGCTTTGTACGTTGAGAGG      | 720  |
| BS.seq         | ATGAGGAACCGTCTTACATTTCTAGGAAGGTCCTCTGTGTGTGACGGAACCGAGGAGCTAAGATGTGAAAGCGTTTAGGAACATTACTGGCGTTGAGCTTTGTACGTTGAGAGG      | 720  |
| JC007-2B.seq   | ATGAGGAACCGTCTTACATTTCTAGGAAGGTCCTCTGTGTGTGACGGAACCGAGGAGCTAAGATGTGAAAGCGTTTAGGAACATTACTGGCGTTGAGCTTTGTACGTTGAGAGG      | 720  |
| Consensus      | ATGAGGAACCGTCTTACATTTCTAGGAAGGTCCTCTGTGTGTGACGGAACCGAGGAGCTAAGATGTGAAAGCGTTTAGGAACATTACTGGCGTTGAGCTTTGTACGTTGAGAGG      |      |
| Bo3g002090.seq | CTTAAGTTGTGAGGCTAGCTCTGGTGGTCACTTGGGAGGTTTGTTATTTGGACTAAGCTGCTTTTGAAGGCTTGAGCTATCTATGGATCTGTTGAGAGCCGCTGAGATGAAG        | 840  |
| BS.seq         | CTTAAGTTGTGAGGCTAGCTCTGGTGGTCACTTGGGAGGTTTGTTATTTGGACTAAGCTGCTTTTGAAGGCTTGAGCTATCTATGGATCTGTTGAGAGCCGCTGAGATGAAG        | 840  |
| JC007-2B.seq   | CTTAAGTTGTGAGGCTAGCTCTGGTGGTCACTTGGGAGGTTTGTTATTTGGACTAAGCTGCTTTTGAAGGCTTGAGCTATCTATGGATCTGTTGAGAGCCGCTGAGATGAAG        | 840  |
| Consensus      | CTTAAGTTGTGAGGCTAGCTCTGGTGGTCACTTGGGAGGTTTGTTATTTGGACTAAGCTGCTTTTGAAGGCTTGAGCTATCTATGGATCTGTTGAGAGCCGCTGAGATGAAG        |      |
| Bo3g002090.seq | AAGGGTTATGCTTGCCTCGTGGAGATGGTGAAGCTGATTGGCGAGGATTATTAATCGGATGAGGTTGAGAGCTGGTGTGAAGCGGATTAAAGAGGATGCGAAGAGAGCTGTGATG     | 960  |
| BS.seq         | AAGGGTTATGCTTGCCTCGTGGAGATGGTGAAGCTGATTGGCGAGGATTATTAATCGGATGAGGTTGAGAGCTGGTGTGAAGCGGATTAAAGAGGATGCGAAGAGAGCTGTGATG     | 960  |
| JC007-2B.seq   | AAGGGTTATGCTTGCCTCGTGGAGATGGTGAAGCTGATTGGCGAGGATTATTAATCGGATGAGGTTGAGAGCTGGTGTGAAGCGGATTAAAGAGGATGCGAAGAGAGCTGTGATG     | 960  |
| Consensus      | AAGGGTTATGCTTGCCTCGTGGAGATGGTGAAGCTGATTGGCGAGGATTATTAATCGGATGAGGTTGAGAGCTGGTGTGAAGCGGATTAAAGAGGATGCGAAGAGAGCTGTGATG     |      |
| Bo3g002090.seq | AAGAAGAATCCGTTGAAGAATCTTAATGTGATGCTTAAGTTGAATCCTTATGCTAAGACCGGGAAGAGGATGCTTTGTTGCTGAAGCGCAGAGGTTAAGTCTAAGAAGGAGAGCTC    | 1080 |
| BS.seq         | AAGAAGAATCCGTTGAAGAATCTTAATGTGATGCTTAAGTTGAATCCTTATGCTAAGACCGGGAAGAGGATGCTTTGTTGCTGAAGCGCAGAGGTTAAGTCTAAGAAGGAGAGCTC    | 1080 |
| JC007-2B.seq   | AAGAAGAATCCGTTGAAGAATCTTAATGTGATGCTTAAGTTGAATCCTTATGCTAAGACCGGGAAGAGGATGCTTTGTTGCTGAAGCGCAGAGGTTAAGTCTAAGAAGGAGAGCTC    | 1080 |
| Consensus      | AAGAAGAATCCGTTGAAGAATCTTAATGTGATGCTTAAGTTGAATCCTTATGCTAAGACCGGGAAGAGGATGCTTTGTTGCTGAAGCGCAGAGGTTAAGTCTAAGAAGGAGAGCTC    |      |
| Bo3g002090.seq | GAGAAGAAGAGGAGGCGCTCTAAGGTAACCTAACCGCTCTCTCTTCTCTAAGCCCTTTTTTTT...ATGTGGGTTACAGTTTGTATTATCTTGTGAATTCAGACACATTACATT      | 1198 |
| BS.seq         | GAGAAGAAGAGGAGGCGCTCTAAGGTAACCTAACCGCTCTCTCTTCTCTAAGCCCTTTTTTTT...ATGTGGGTTACAGTTTGTATTATCTTGTGAATTCAGACACATTACATT      | 1200 |
| JC007-2B.seq   | GAGAAGAAGAGGAGGCGCTCTAAGGTAACCTAACCGCTCTCTCTTCTCTAAGCCCTTTTTTTT...ATGTGGGTTACAGTTTGTATTATCTTGTGAATTCAGACACATTACATT      | 1198 |
| Consensus      | GAGAAGAAGAGGAGGCGCTCTAAGGTAACCTAACCGCTCTCTCTTCTCTAAGCCCTTTTTTTT...ATGTGGGTTACAGTTTGTATTATCTTGTGAATTCAGACACATTACATT      |      |
| Bo3g002090.seq | TAGATTAGTTTTGTATAACTCATGTTCTGTCTGAACATTTCTATAGGTTTTTTTAAATCTTTTTTGTCTTTAGAAATCCCAAAGCTGGACTCATTTCTCAAACTCGTTTGTCTTTGTTA | 1318 |
| BS.seq         | TAGATTAGTTTTGTATAACTCATGTTCTGTCTGAACATTTCTATAGGTTTTTTTAAATCTTTTTTGTCTTTAGAAATCCCAAAGCTGGACTCATTTCTCAAACTCGTTTGTCTTTGTTA | 1320 |
| JC007-2B.seq   | TAGATTAGTTTTGTATAACTCATGTTCTGTCTGAACATTTCTATAGGTTTTTTTAAATCTTTTTTGTCTTTAGAAATCCCAAAGCTGGACTCATTTCTCAAACTCGTTTGTCTTTGTTA | 1318 |
| Consensus      | TAGATTAGTTTTGTATAACTCATGTTCTGTCTGAACATTTCTATAGGTTTTTTTAAATCTTTTTTGTCTTTAGAAATCCCAAAGCTGGACTCATTTCTCAAACTCGTTTGTCTTTGTTA |      |
| Bo3g002090.seq | CTCTAGGAGCAATCAAGCCATTAAAGCAGCAGGAAAAGCGTGGTACCAGACTATGATCTCCGACAGTGACTACACAGAGTTTGATAAATTCACCAAGTGGCTCGGAGCCAGTCAGTAA  | 1438 |
| BS.seq         | CTCTAGGAGCAATCAAGCCATTAAAGCAGCAGGAAAAGCGTGGTACCAGACTATGATCTCCGACAGTGACTACACAGAGTTTGATAAATTCACCAAGTGGCTCGGAGCCAGTCAGTAA  | 1440 |
| JC007-2B.seq   | CTCTAGGAGCAATCAAGCCATTAAAGCAGCAGGAAAAGCGTGGTACCAGACTATGATCTCCGACAGTGACTACACAGAGTTTGATAAATTCACCAAGTGGCTCGGAGCCAGTCAGTAA  | 1438 |
| Consensus      | CTCTAGGAGCAATCAAGCCATTAAAGCAGCAGGAAAAGCGTGGTACCAGACTATGATCTCCGACAGTGACTACACAGAGTTTGATAAATTCACCAAGTGGCTCGGAGCCAGTCAGTAA  |      |

**Figure S2. Alignments of nucleotide sequences of *Bo3g002090* in ‘BS’ and ‘JC007-2B’. Note:** *Bo3g002090* is the reference genome sequence of cabbage; Blue underline indicates exon; Red underline indicates intron.

a

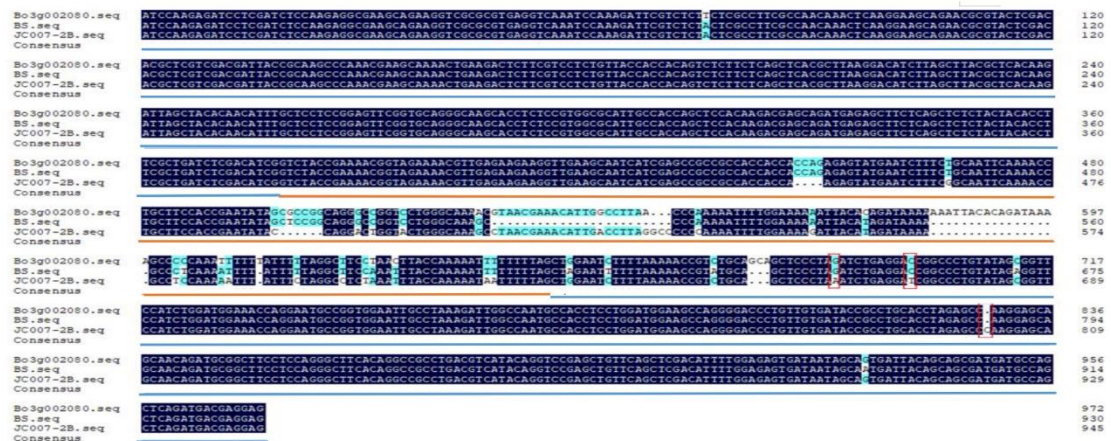

b

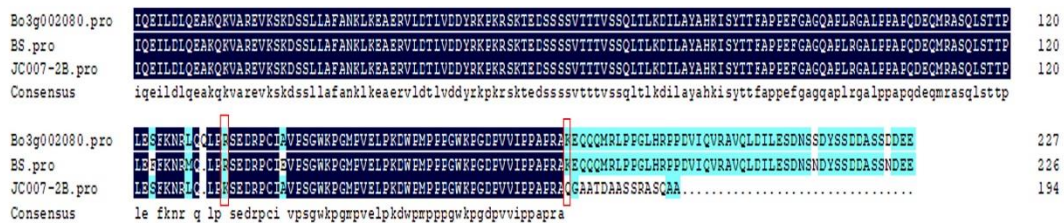

**Figure S3. Nucleotide and amino acid sequence alignments of *Bo3g002080* in ‘BS’ and ‘JC007-2B’.** (a) Nucleotide sequences alignments of *Bo3g002080* in ‘BS’ and ‘JC007-2B’. Blue underline represents exon; Red underline represents intron. (b) Amino acid sequence alignment of *Bo3g002080* in ‘JC007-2B’ and ‘BS’. ‘Bo3g002080’ is the reference genome sequence of from non-variegated phenotype cabbage. Red boxes represent base substitutions.



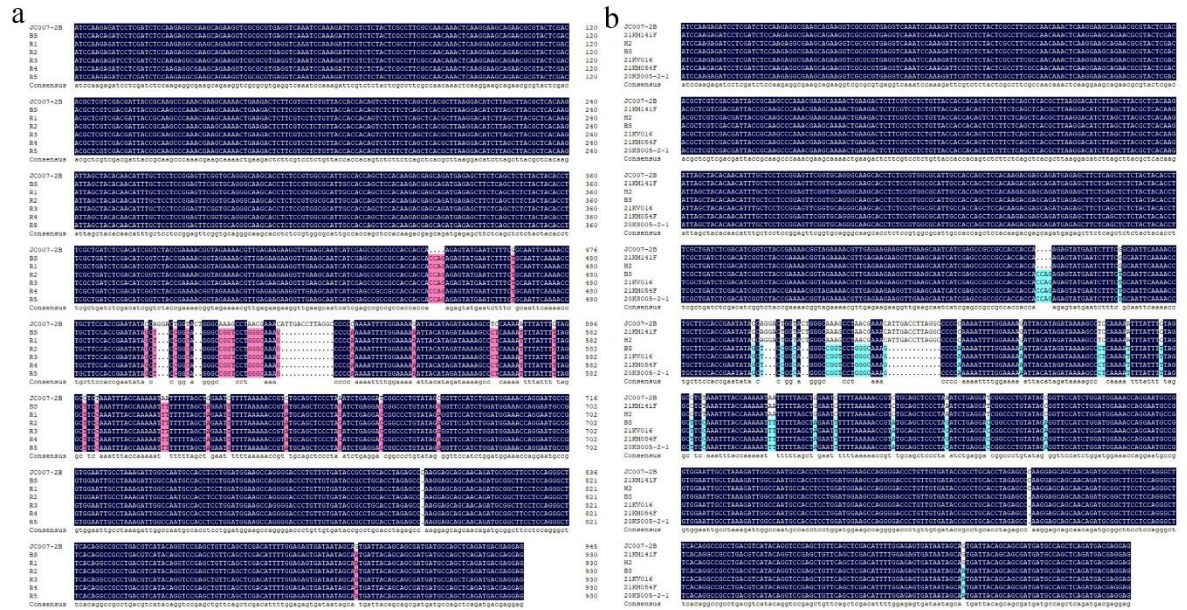

**Figure S4. Nucleotide sequences alignments of *Bo3g002080* in two parents, F<sub>2</sub> recombinant plants and DH line plants.** (a) Nucleotide sequences alignments of *Bo3g002080* among two parents and recombinant plants. R1-R5 represent the five recombinant plants that identified by Q3I-8 and Q3I-15; (b) Nucleotide sequences alignments of *Bo3g002080* among two parents and DH lines. ‘JC007-2B’, ‘H2’ and ‘21KM141F’ were with variegated leaf, while the leaf phenotype of ‘BS’, ‘21KV016’, ‘21KM054F’ and ‘20KS005-2-1’ was normal.

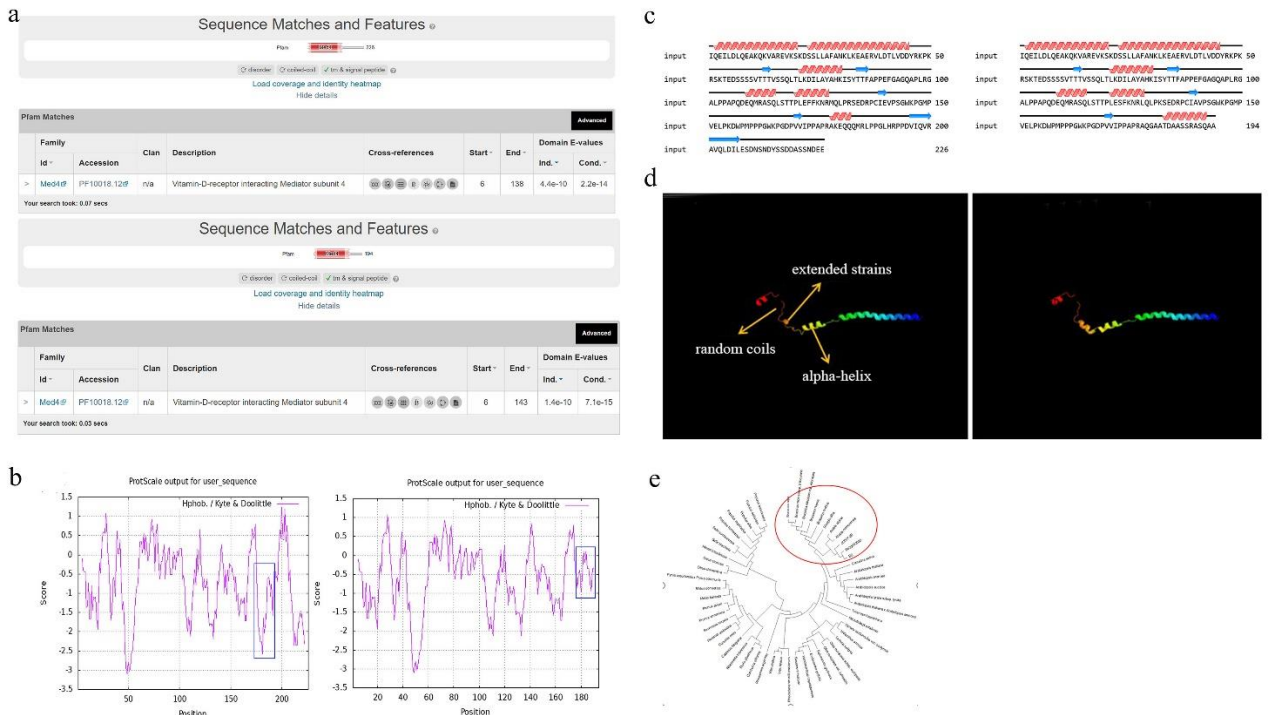

**Figure S5. Hydrophobicity and the protein structure of the candidate gene.** (a) Conserved domain analysis, the upper figure was the conserved domain analysis of 'BS', and the down figure was the conserved domain analysis of 'JC007-2B'; (b) Hydrophobicity analysis of 'BS' and 'JC007-2B' protein. The left figure was the hydrophobicity analysis of 'BS', and the right figure was the hydrophobicity analysis of 'JC007-2B'; (c) The predicted secondary structure of 'BS' and 'JC007-2B' protein. The left figure was the predicted secondary structure of 'BS', and the right figure was the predicted secondary structure of 'JC007-2B'. The red asterisk represents the position of 132 amino acids, and the green asterisk represents the position of 179 amino acids; (d) The predicted secondary structure of 'BS' and 'JC007-2B' protein. The left figure was the predicted secondary structure of 'BS', and the right figure was the predicted secondary structure of 'JC007-2B'; (e) Phylogenetic tree of *B03g002080*, 'BS' and 'JC007-2B' in ornamental kale and other species. *Brassica rapa* (RID43011.1); *Brassica cretica* (KAF2535840.1); *Brassica oleracea* var. *oleracea* (XP013611601.1); *Brassica napus* (KAH0908033.1); *Arabis alpina* (KFK24735.1); *Brassica rapa* subsp. *trilocularis* (VVB12997.1); *Camelina sativa* (XP010490754.1); *Tarenaya hassleriana* (XP010553019.1); *Prunus armeniaca* (CAB4304152.1); *Capsella rubella* (XP006287800.1); *Carpinus fangiana* (KAE8099520.1); *Arabidopsis arenosa* (CAE6085689.1); *Arabidopsis suecica* (KAG7553896.1); *Arabidopsis thaliana* (AAP40461.1); *Arabidopsis lyrata* subsp. *Lyrata* (XP020879558.1); *Camelina sativa* (XP010423809.1); *Arabidopsis thaliana* x *Arabidopsis arenosa* (KAG7549282.1); *Helianthus annuus* (XP022039233.1); *Sesamum indicum* (XP011077385.1); *Citrus clementina* (XP006428900.1); *Rehmannia glutinosa* (ALO61893.1); *Salix brachista* (KAB5519807.1); *Salix dunnii* (KAF9664990.1); *Olea europaea* subsp. *Europaea* (CAA3013307.1); *Durio zibethinus* (XP022748477.1); *Olea europaea* var. *Sylvestris* (XP022846688.1); *Sinapis alba* (KAF8088602.1); *Populus trichocarpa* (XP\_002322847.1); *Populus deltoides* (KAH8485176.1); *Salix suchowensis* (KAG5253153.1); *Prunus armeniaca* (CAB4270352.1); *Populus euphratica* (XP011048421.1); *Handroanthus impetiginosus* (PIN03719.1); *Nicotiana attenuata* (XP019238085.1); *Lactuca sativa* (XP023762142.1); *Citrus sinensis* (XP006480577.1); *Malus baccata* (TQE13352.1); *Populus tomentosa* (KAG6744068.1); *Populus alba* (XP034910512.1); *Pyrus ussuriensis* x *Pyrus communis* (KAB2597909.1); *Malus domestica* (RXI07622.1); *Cucumis sativus* (XP004142109.1); *Corchorus olitorius* (OMO73465.1); *Cynara cardunculus* var. *Scolymus* (XP024990234.1); *Hevea brasiliensis* (XP021666870.1); *Cucumis melo* (XP008449288.1); *Rhododendron williamsianum* (KAE9447899.1); *Prunus avium* (XP021822650.1); *Vitis vinifera* (XP002273310.1); *Benincasa hispida* (XP038882754.1); *Vitis riparia* (XP034693987.1); *Vitis vinifera* (RVW98737.1); *Erythranthe guttata* (XP\_012842735.1).

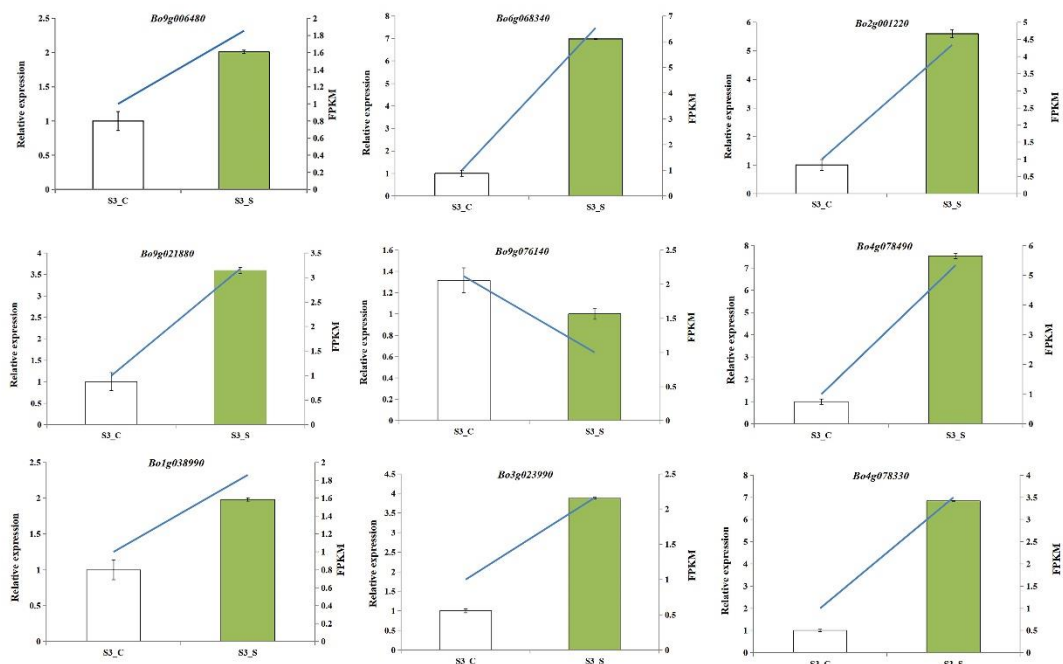

**Figure S6. The validation and expression analysis of another 9 randomly selected genes using qRT-PCR.**

**Table S1** Data statistics and quality control of RNA-Seq.

| Sample | Raw Data     | Valid Data   | Valid Ratio (reads) | Q20%  | Q30%  | GC content% |
|--------|--------------|--------------|---------------------|-------|-------|-------------|
| S3_S_1 | 378, 777, 42 | 373, 854, 02 | 98.70               | 99.67 | 96.23 | 47          |
| S3_S_2 | 478, 043, 84 | 472, 213, 44 | 98.78               | 99.64 | 96.11 | 47          |
| S3_S_3 | 504, 932, 20 | 499, 029, 14 | 98.83               | 99.68 | 96.25 | 46.5        |
| S3_C_1 | 521, 933, 28 | 516, 489, 84 | 98.96               | 99.77 | 96.46 | 46.5        |
| S3_C_2 | 574, 185, 18 | 567, 177, 70 | 98.78               | 99.64 | 95.92 | 46.5        |
| S3_C_3 | 487, 531, 74 | 483, 011, 34 | 99.07               | 99.76 | 96.12 | 47          |

**Table S2** Reference genome alignment reads statistics.

| Sample | Valid reads | Mapped reads        | Unique Mapped reads | Multi Mapped reads | PE Mapped reads<br>Pair-end |
|--------|-------------|---------------------|---------------------|--------------------|-----------------------------|
| S3_S_1 | 373,854,02  | 334,514,59 (89.48%) | 245,067,02 (65.55%) | 894,475,7 (23.93%) | 297,076,06 (79.46%)         |

|        |            |                     |                     |                     |                     |
|--------|------------|---------------------|---------------------|---------------------|---------------------|
| S3_S_2 | 472,213,44 | 419,359,98 (88.81%) | 309,063,02 (65.45%) | 110,296,96 (23.36%) | 372,903,16 (78.97%) |
| S3_S_3 | 499,029,14 | 445,226,67 (89.22%) | 328,172,86 (65.76%) | 117,053,81 (23.46%) | 402,526,62 (80.66%) |
| S3_C_1 | 516,489,84 | 459,860,60 (89.04%) | 336,564,87 (65.16%) | 123,295,73 (23.87%) | 418,153,94 (80.96%) |
| S3_C_2 | 567,177,70 | 501,622,41 (88.44%) | 367,100,13 (64.72%) | 134,522,28 (23.72%) | 444,724,58 (78.41%) |
| S3_C_3 | 483,011,34 | 429,720,63 (88.97%) | 310,603,44 (64.31%) | 119,117,19 (24.66%) | 391,313,86 (81.02%) |

**Table S3** Primer sequences for *Bo3g002070*, *Bo3g002080*, *Bo3g002090*.

| Gene              | Primers  | Sequences (5' to 3')         |
|-------------------|----------|------------------------------|
| <i>Bo3g002070</i> | 2070-1-L | ATGACCTCGTCTCTTTCAAGCAAT     |
|                   | 2070-1-R | CTTCTCCTCCACAAAGAGTGTCAAT    |
|                   | 2070-2-L | CGGATATGGTTCATGGGATGA        |
|                   | 2070-2-R | TTCGAAATTTATAGGATCCATTTCC    |
|                   | 2070-3-L | CGGATATGGTTCATGGGATGA        |
|                   | 2070-3-R | ATAAGTGTTCCTGAACCTTCCTCTGC   |
| <i>Bo3g002080</i> | 2080-1-L | GGGATATTAAATCGTATTGGTCTGG    |
|                   | 2080-1-R | TGACTTACTCCTCGTCATCTGAGC     |
|                   | 2080-2-L | TAAACGCACAGCCACACTCCT        |
|                   | 2080-2-R | TCCAAATAACAAACCTCCCAAGAT     |
| <i>Bo3g002090</i> | 2090-1-L | AAGCGTTTAGGAACATTACTGGCG     |
|                   | 2090-1-R | ATAACCAAAATCTTATATGAGACGACAA |

**Table S4** Primers used to validate expression patterns determined by transcriptome profiling, and primers for the qRT-PCR of candidate genes.

| Markers     | Forward primer sequences (5'→3') | Reverse primer sequence (5'→3') | Gene              |
|-------------|----------------------------------|---------------------------------|-------------------|
| CAD         | GCCGTA CTGTCTCTGCTTAG            | TCCTCTGTTTCCTTCATGCTC           | <i>Bo7g116770</i> |
| PSAO        | GCTCTCACTTCTCAGTTCTGG            | ATCCGATTTGTCCGAAGGTG            | <i>Bo8g112500</i> |
| LHCA4       | CTTAAC TCGCTCCTACGCTC            | TCACGAACCCTAAGAATGCC            | <i>Bo3g134510</i> |
| PSBQ        | GGATAGATGGTCCTCTTCCAAC           | CTTCCTTTGGTCCCGATGTC            | <i>Bo1g158910</i> |
| LHCB4       | GAAAGGTGGAGCTAGTGGATG            | GGGTACAAACGCTTCTCAGAG           | <i>Bo2g001220</i> |
| LHCB6       | AGAATTTCTGCTGTATCCCGG            | ACTTTCAACCTCTCCAGCTTC           | <i>Bo8g066580</i> |
| PSAE        | AATCCTACTGGTTCAAGAGCG            | TCTTCAATCTCGTCCAGTGC            | <i>Bo8g054500</i> |
| PSAN        | ATGTTGATGGGTCTAGTGGAAG           | GAGGTATTCATCGAAGACGCTA<br>G     | <i>Bo3g102750</i> |
| GLK1        | AGGAAAAGGGTCTTGAGGTTT            | GGTGAGTGCTTACAGGTACATG          | <i>Bo7g003410</i> |
| YBo3g002070 | TCGTCTCTTTCAAGCAATCCG            | CTGTCTGGACTTGGATATCGTG          | <i>Bo3g002070</i> |
| YBo3g002080 | CAAAC TCAAGGAAGCAGAACG           | GTGGTAACAGAGGACGAAGAG           | <i>Bo3g002080</i> |
| YBo3g002090 | TGGTCATCTTGGGAGGTTTG             | GCCAAATCAGCATTCACCATC           | <i>Bo3g002090</i> |
| Actin       | GGTCGTGACCTTACTGATTACCT<br>CA    | GAAGTCTCCATCTCCTGCTCGT          | <i>Bo1g116200</i> |
